# Supplementary material for: Structural reorganization renders enhanced metalloprotein stability
Source: Royal Society of Chemistry journal article supplement (doi:10.1039/c1cc13354c), 2011-01-01
Supplement: c1cc13354c.pdf [file c1cc13354c.pdf]

## Structural reorganization renders enhanced metalloprotein stability

Hugo M. Botelho<sup>a</sup> and Cláudio M. Gomes<sup>\*a</sup>

### Electronic Supplementary Information

#### 5 Materials and Methods

##### Rubredoxin

Desulfovibrio gigas rubredoxin (RdDg) was purified as previously described<sup>1</sup>. Protein concentration was determined spectrophotometrically using the visible absorption extinction coefficients  $\epsilon^{376\text{nm}} = 8450 \text{ M}^{-1}\text{cm}^{-1}$  and  $\epsilon^{493\text{nm}} = 6970 \text{ M}^{-1}\text{cm}^{-1}$ <sup>2</sup>. Purity was verified by the absorption ratio between 377 and 278 nm equaling 0.45. Buffer was 50 mM potassium phosphate at pH 7.

#### 10 UV/visible absorption

UV/visible absorption spectra were recorded using a Shimadzu UV-1700 spectrophotometer at room temperature.

##### Circular dichroism

CD measurements were recorded in a Jasco J-815 spectropolarimeter equipped with a Peltier-controlled thermostated cell support. 0.1 cm (far UV) and 1 cm (near UV/visible) pathlength cuvettes were used. Thermal denaturation experiments were carried out increasing the temperature from 25 to 95°C at a heating rate of 1°C/min. Every 5°C spectra were acquired. Thermal denaturation was assessed by the CD signal variations at local spectra maxima and minima. Protein concentration was 0.1 mg/ml (17.6  $\mu\text{M}$ , far UV) or 0.62 mg/ml (109  $\mu\text{M}$ , near UV/visible). Far UV CD spectra were accumulated 4 times at 200 nm/min scan rate and 1 s time response. Near UV/visible spectra were accumulated 5 times at 1000 nm/min scan rate and 0.5 s time response.

##### ATR FT-IR spectroscopy

20 Attenuated total reflectance Fourier transform infrared spectroscopy (ATR FT-IR) measurements were performed using a Bruker IFS 66/S spectrometer equipped with a nitrogen-cooled MCT detector using the thermostated Harrick BioATR cell II. Protein was concentrated to 10 mg/ml and centrifuged at 12000 g before the temperature ramp to pellet any aggregates forming while concentrating. FT-IR spectra in the amide I (1600-1700  $\text{cm}^{-1}$ ) and amide II (1500-1600  $\text{cm}^{-1}$ ) regions were recorded while temperature was increased from 20 to 94°C in a discontinuous fashion: spectra were accumulated during 1 minute (97 accumulations), temperature was raised 2°C during around 45 seconds and sample was equilibrated 15 seconds. Overall temperature change rate was 1.1°C/min. Spectral resolution was 4  $\text{cm}^{-1}$ , scanner velocity was 20.0 kHz and aperture was 12 mm. Spectra were analyzed after vector normalization. Spectral variations at specific wavenumbers within the amide I band were assigned to secondary structure changes<sup>3</sup>. Deconvolution was performed as previously described<sup>3</sup>. Briefly, the amide I band corresponding to native rubredoxin (20°C) was reconstituted as the sum of gaussian curves centered at second derivative minima. These bands were assigned to secondary structures according to their spectral position<sup>3</sup>. Then, the component bands' center position was fixed and the remaining spectra were reconstituted by adjusting the curve area and bandwidth. Secondary structure content was estimated from gaussian curve integration.

##### Structural analysis

The secondary structure content of RdDg was extracted from the crystal structure (2DSX)<sup>4</sup> using pdbsum (<http://www.ebi.ac.uk/pdbsum/>).

35

## Supplementary tables

**Supplementary Table S1.** Band assignment for the deconvolution of FT-IR spectra.

| Wavenumber (cm <sup>-1</sup> ) | Structure |
|--------------------------------|-----------|
| 1684                           | β-sheets  |
| 1661                           | Turns     |
| 1643                           | Coil      |
| 1639                           | Coil      |
| 1644                           | α-helices |
| 1625                           | β-sheets  |
| 1603                           | Mixed*    |

\*β-sheets and amino acid side chains absorb in this region. Discarded for secondary structure quantification.

## Supplementary figures

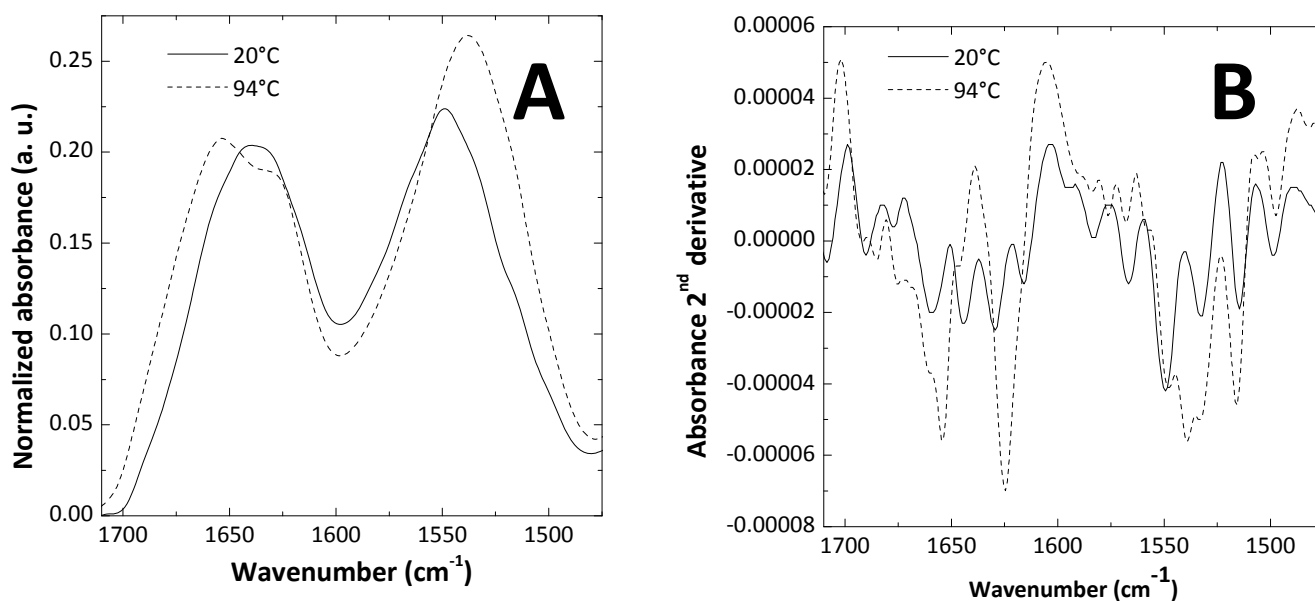

**Supplementary Figure S1.** FT-IR monitored thermal denaturation of rubredoxin. Amide I – amide II FT-IR spectra were recorded while increasing the temperature from 20°C to 94°C. (A) FT-IR absorption spectra. (B) Second derivative spectra. The spectra obtained at 20°C (solid line) and 94°C (dashed line) are depicted.

## Notes and references

<sup>a</sup> Instituto de Tecnologia Química e Biológica, Universidade Nova de Lisboa, Av. República, EAN 2785-572, Oeiras, Portugal. Fax: +351 214 411 277; Tel: +351 214 469 332; E-mail: gomes@itqb.unl.pt

1. M. Bruschi, C. Hatchikian, J. Le Gall, J. J. Moura and A. V. Xavier, *Biochim Biophys Acta*, 1976, **449**, 275-284.
2. C. M. Gomes, Universidade Nova de Lisboa, 1999.
3. A. Barth and C. Zscherp, *Q Rev Biophys*, 2002, **35**, 369-430.
4. C. J. Chen, Y. H. Lin, Y. C. Huang and M. Y. Liu, *Biochem Biophys Res Commun*, 2006, **349**, 79-90.
